# Supplementary material for: Csp3–F bond activation by nucleophilic attack of the {Pt2S2} core assisted by non-covalent interactions
Source: Royal Society of Chemistry journal article supplement (doi:10.1039/b801889h), 2008-01-01
Supplement: b801889h.pdf [file b801889h.pdf]

## Supporting Information:

### **C<sub>sp3</sub>-F bond activation by nucleophilic attack of the {Pt<sub>2</sub>S<sub>2</sub>} core assisted by non-covalent interactions**

Ainara Nova, Rubén Mas-Ballesté, Gregori Ujaque, Pilar González-Duarte,\* Agustí Lledós.\*

*Departament de Química, Edifici Cn, Universitat Autònoma de Barcelona, 08193 Bellaterra, Barcelona, Spain.  
Departamento de Química Inorgánica, Universidad Autónoma de Madrid, 28049 Madrid, Spain*

E-mail: [Agusti@klinton.uab.es](mailto:Agusti@klinton.uab.es), [Pilar.Gonzalez.Duarte@uab.es](mailto:Pilar.Gonzalez.Duarte@uab.es)

## Table of Contents

|                                                                                    |           |
|------------------------------------------------------------------------------------|-----------|
| <b>I) Computational details</b>                                                    | <b>3</b>  |
| <b>II) Optimized geometries (cartesian coordinates) for all calculated species</b> | <b>4</b>  |
| <b>III) Tables of energies</b>                                                     | <b>10</b> |
| <b>IV) Graphic representation of relative energies</b>                             | <b>11</b> |
| <b>V) Experimental details</b>                                                     | <b>11</b> |
| <b>a) Materials and methods</b>                                                    | <b>11</b> |
| <b>b) Experimental procedures and characterization data for 3</b>                  | <b>12</b> |
| <b>c) NMR data for compound 3</b>                                                  | <b>13</b> |
| <b>d) FAB-MS data for compound 3</b>                                               | <b>16</b> |

### I) Computational Details:

The calculations were performed using the Gaussian03 package.<sup>[1]</sup> The geometries of the minima and transition states were fully optimized at B3LYP level. The reaction mechanism involves a S<sub>N</sub>2 reaction step (see text). It is well known that for this type of processes DFT calculations underestimate the reaction barriers.<sup>[2]</sup> Therefore, the energies here presented were obtained from single point calculations at MP2 level. The solvent effects (toluene,  $\epsilon = 2.379$ ) were included by means of PCM calculation using the CPCM<sup>[3]</sup> polarizable conductor calculation model.<sup>[4]</sup>

For the Pt, P and S atoms, the lanl2dz effective core potential was used to describe the innermost electrons,<sup>[5]</sup> whereas their associated double- $\zeta$  basis set was employed for the rest of the electrons. An extra series of d-polarization functions were also added for P (exp. 0.387) and S (exp. 0.503) atoms.<sup>[6]</sup> The carbon and oxygen atoms of 1,3-difluoro-2-propanol were described by the 6-31G(d) basis set.<sup>[7]</sup> The rest of the C and H atoms was described by the 6-31G basis set. The fluorine atoms were described by the 6-31G+(d) basis set.<sup>[8]</sup>

- 
- [1] Frisch, M. J.; Trucks, G. W.; Schlegel, H. B.; Scuseria, G. E.; Robb, M. A.; Cheeseman, J. R.; Montgomery, J. A.; Jr.; Vreven, T.; Kudin, K. N.; Burant, J. C.; Millam, J. M.; Iyengar, S. S.; Tomasi, J.; Barone, V.; Mennucci, B.; Cossi, M.; Scalmani, G.; Rega, N.; Petersson, G. A.; Nakatsuji, H.; Hada, M.; Ehara, M.; Toyota, K.; Fukuda, R.; Hasegawa, J.; Ishida, M.; Nakajima, T.; Honda, Y.; Kitao, O.; Nakai, H.; Klene, M.; Li, X.; Knox, J. E.; Hratchian, H. P.; Cross, J. B.; Adamo, C.; Jaramillo, J.; Gomperts, R.; Stratmann, R. E.; Yazyev, O.; Austin, A. J.; Cammi, R.; Pomelli, C.; Ochterski, J. W.; Ayala, P. Y.; Morokuma, K.; Voth, G. A.; Salvador, P.; Dannenberg, J. J.; Zakrzewski, V. G.; Dapprich, S.; Daniels, A. D.; Strain, M. C.; Farkas, O.; Malick, D. K.; Rabuck, A. D.; Raghavachari, K.; Foresman, J. B.; Ortiz, J. V.; Cui, Q.; Baboul, A. G.; Clifford, S.; Cioslowski, J.; Stefanov, B. B.; Liu, G.; Liashenko, A.; Piskorz, P.; Komaromi, I.; Martin, R. L.; Fox, D. J.; Keith, T.; Al-Laham, M. A.; Peng, C. Y.; Nanayakkara, A.; Challacombe, M.; Gill, P. M. W.; Johnson, B.; Chen, W.; Wong, M. W.; Gonzalez, C.; Pople, J. A.; Gaussian 03, Revision C.02, Inc., Wallingford CT, **2004**.
- [2] Koch, W.; Holthausen, M. C., *A Chemist's Guide to Density Functional Theory*, 2th ed., Wiley-VCH, Weinheim, **2002**.
- [3] a) Barone, V.; Cossi, M., *J. Phys. Chem. A* **1998**, *102*, 1995. b) Cossi, M.; Scalmani, G.; Rega, N.; Barone, V., *J. Comp. Chem.* **2003**, *24*, 669.
- [4] Tomasi, J.; Persico, M., *Chem. Rev.* **1994**, *94*, 2027
- [5] Hay, P. J.; Wadt, W. R., *J. Chem. Phys.* **1985**, *82*, 299.
- [6] Höllwarth, A.; Böhme, M.; Dapprich, S.; Ehlers, A. W.; Gobbi, A.; Jonas, V.; Köhler, K. F.; Stegman, R.; Veldkamp, A.; Frenking, G., *Chem. Phys. Lett.* **1993**, *208*, 237.
- [7] Hehre, W. J.; Ditchfield, R.; Pople, J. A., *J. Phys. Chem.* **1972**, *56*, 2257.
- [8] Frisch, M. J.; Pople, J. A.; Binkley, J. S., *J. Chem. Phys.* **1984**, *80*, 3265.

## II) Optimized Geometries (Cartesian coordinates) for all Calculated Species

### 1: FCH<sub>2</sub>CH(OH)CH<sub>2</sub>F

|   |          |           |           |
|---|----------|-----------|-----------|
| C | 3.280696 | -0.282307 | -2.159425 |
| C | 2.187257 | -0.443137 | -3.209166 |
| H | 1.262979 | -0.722491 | -2.687844 |
| C | 2.523848 | -1.553207 | -4.203000 |
| H | 3.362831 | -1.274755 | -4.849075 |
| H | 2.758025 | -2.490768 | -3.686262 |
| F | 1.421491 | -1.795410 | -5.030803 |
| H | 3.019386 | 0.510681  | -1.454608 |
| H | 3.497443 | -1.212547 | -1.624534 |
| O | 1.908080 | 0.787954  | -3.846224 |
| H | 2.716528 | 1.076638  | -4.301690 |
| F | 4.474845 | 0.116324  | -2.803816 |

### 2: [Pt<sub>2</sub>(μ-S)<sub>2</sub>(dppp)<sub>2</sub>]

|    |           |           |           |
|----|-----------|-----------|-----------|
| Pt | -1.646038 | 0.000044  | -0.520642 |
| Pt | 1.645912  | 0.000109  | -0.520103 |
| S  | 0.000015  | 1.613559  | -1.210873 |
| S  | 0.000071  | -1.613168 | -1.211384 |
| P  | -3.040714 | 1.700411  | 0.130143  |
| P  | -3.040397 | -1.700448 | 0.130470  |
| P  | 3.040490  | -1.700345 | 0.130653  |
| P  | 3.040575  | 1.700507  | 0.130658  |
| H  | -2.767861 | 2.314457  | 1.386836  |
| C  | -4.860276 | 1.306867  | 0.320008  |
| H  | -3.086450 | 2.877783  | -0.664988 |
| H  | -3.086067 | -2.878068 | -0.664305 |
| H  | -2.767286 | -2.314091 | 1.387302  |
| C  | -4.860016 | -1.307167 | 0.320387  |
| H  | 3.085761  | -2.877936 | -0.664179 |
| C  | 4.860189  | -1.307012 | 0.319710  |
| H  | 2.768030  | -2.314029 | 1.387618  |
| H  | 2.768318  | 2.314297  | 1.387617  |
| H  | 3.085843  | 2.878044  | -0.664251 |
| C  | 4.860255  | 1.307030  | 0.319543  |
| H  | -5.352331 | 2.152462  | 0.814875  |
| H  | -5.281583 | 1.231175  | -0.691038 |
| H  | -5.281395 | -1.231861 | -0.690660 |
| H  | -5.351881 | -2.152711 | 0.815532  |
| H  | 5.352324  | -2.152571 | 0.814560  |
| H  | 5.281069  | -1.231623 | -0.691538 |
| H  | 5.281005  | 1.231441  | -0.691743 |
| H  | 5.352546  | 2.152606  | 0.814210  |
| C  | 5.145723  | 0.000051  | 1.102642  |

|   |           |           |          |
|---|-----------|-----------|----------|
| C | -5.145248 | -0.000064 | 1.103367 |
| H | -6.208467 | -0.000142 | 1.377643 |
| H | -4.589457 | 0.000124  | 2.052587 |
| H | 6.209082  | 0.000037  | 1.376369 |
| H | 4.590419  | 0.000125  | 2.052146 |

**1...2: [Pt<sub>2</sub>(μ-S)<sub>2</sub>(dppp)<sub>2</sub>]·FCH<sub>2</sub>CH(OH)CH<sub>2</sub>F (van der Waals complex)**

|    |           |           |           |
|----|-----------|-----------|-----------|
| Pt | 0.146959  | -0.077649 | 2.153717  |
| Pt | -0.725895 | 0.160254  | -1.069665 |
| S  | -0.269427 | -1.682581 | 0.413993  |
| S  | 0.819770  | 1.356208  | 0.344978  |
| P  | -0.594340 | -1.581171 | 3.721642  |
| P  | 0.534056  | 1.617629  | 3.653754  |
| P  | -0.942212 | 1.994610  | -2.446745 |
| P  | -2.139594 | -1.146680 | -2.325772 |
| H  | -2.004702 | -1.710839 | 3.877910  |
| C  | -0.065692 | -1.315366 | 5.495782  |
| H  | -0.282895 | -2.954898 | 3.531468  |
| H  | 1.638549  | 2.482187  | 3.422936  |
| H  | -0.480292 | 2.610998  | 3.773862  |
| C  | 0.789821  | 1.155837  | 5.448950  |
| H  | 0.161638  | 2.883510  | -2.504731 |
| C  | -1.268047 | 1.648126  | -4.249739 |
| H  | -1.967272 | 2.940275  | -2.147054 |
| H  | -3.529723 | -1.137084 | -2.005514 |
| H  | -1.926024 | -2.550629 | -2.289566 |
| C  | -2.185478 | -0.800740 | -4.158576 |
| H  | -0.631009 | -2.001705 | 6.137120  |
| H  | 0.991838  | -1.602456 | 5.563363  |
| H  | 1.800463  | 0.735093  | 5.533556  |
| H  | 0.767875  | 2.071060  | 6.052157  |
| H  | -1.446011 | 2.601680  | -4.761054 |
| H  | -0.336727 | 1.224116  | -4.644069 |
| H  | -1.213909 | -1.111374 | -4.563547 |
| H  | -2.953813 | -1.435812 | -4.615114 |
| C  | -2.453100 | 0.684934  | -4.511741 |
| C  | -0.245864 | 0.140772  | 5.996499  |
| H  | -0.156400 | 0.130922  | 7.090791  |
| H  | -1.266578 | 0.489749  | 5.781656  |
| H  | -2.685451 | 0.731796  | -5.583858 |
| H  | -3.356168 | 1.040932  | -3.993501 |
| C  | 3.395863  | -0.168419 | -2.157050 |
| C  | 2.258012  | -0.457818 | -3.119927 |
| H  | 1.359095  | -0.611448 | -2.510557 |
| C  | 2.504911  | -1.704119 | -3.958015 |
| H  | 3.324641  | -1.570791 | -4.671106 |
| H  | 2.700849  | -2.574579 | -3.323757 |
| F  | 1.350694  | -1.997918 | -4.715460 |
| H  | 3.146605  | 0.675976  | -1.511815 |
| H  | 3.666055  | -1.036422 | -1.550139 |
| O  | 1.983532  | 0.676230  | -3.939239 |
| H  | 2.824217  | 0.951487  | -4.342424 |
| F  | 4.547892  | 0.190379  | -2.917091 |

### TS1

|    |           |           |           |
|----|-----------|-----------|-----------|
| Pt | -0.114817 | -0.026318 | 2.026855  |
| Pt | -0.910130 | -0.321768 | -1.323536 |
| S  | 1.032310  | -0.816604 | 0.052773  |
| S  | -1.425812 | 1.200550  | 0.454873  |
| P  | 1.247401  | -1.257812 | 3.435443  |
| P  | -1.398572 | 0.817476  | 3.733868  |
| P  | -2.557502 | 0.591566  | -2.629227 |
| P  | -0.261768 | -1.691923 | -3.078645 |
| H  | 0.909667  | -2.626478 | 3.644532  |
| C  | 1.429768  | -0.654493 | 5.194078  |
| H  | 2.602387  | -1.438115 | 3.046551  |
| H  | -1.947645 | 2.111518  | 3.537420  |
| H  | -2.596116 | 0.108424  | 4.031397  |
| C  | -0.619591 | 0.954621  | 5.424131  |
| H  | -3.138424 | 1.788768  | -2.135608 |
| C  | -1.937051 | 1.074871  | -4.318595 |
| H  | -3.746052 | -0.130989 | -2.944781 |
| H  | -1.099159 | -2.784429 | -3.454480 |
| H  | 0.968193  | -2.391173 | -2.964830 |
| C  | -0.085388 | -0.759517 | -4.679306 |
| H  | 1.981381  | -1.410274 | 5.764781  |
| H  | 2.053575  | 0.248113  | 5.160655  |
| H  | 0.102439  | 1.780219  | 5.380184  |
| H  | -1.397427 | 1.239778  | 6.141954  |
| H  | -2.747887 | 1.579271  | -4.857348 |
| H  | -1.135589 | 1.805769  | -4.155129 |
| H  | 0.682058  | 0.005618  | -4.495796 |
| H  | 0.290696  | -1.443496 | -5.448592 |
| C  | -1.405458 | -0.109001 | -5.166795 |
| C  | 0.087548  | -0.339479 | 5.901114  |
| H  | 0.296022  | -0.227291 | 6.972834  |
| H  | -0.595616 | -1.197264 | 5.817382  |
| H  | -1.221790 | 0.276339  | -6.177925 |
| H  | -2.189174 | -0.873673 | -5.274173 |
| C  | 2.194673  | 1.035131  | -0.784050 |
| C  | 2.669989  | 0.449484  | -2.112315 |
| H  | 2.270745  | -0.558325 | -2.257769 |
| C  | 4.191157  | 0.307826  | -2.134090 |
| H  | 4.676790  | 1.275553  | -2.255661 |
| H  | 4.557812  | -0.199781 | -1.234848 |
| F  | 4.559380  | -0.505793 | -3.231691 |
| H  | 1.289243  | 1.615769  | -0.751922 |
| H  | 2.856858  | 1.100030  | 0.066531  |
| O  | 2.190272  | 1.235192  | -3.183940 |
| H  | 2.417497  | 2.146560  | -2.852502 |
| F  | 2.994141  | 2.803520  | -1.399305 |

### 3: [Pt<sub>2</sub>(dppp)<sub>2</sub>(μ-S)(μ-SCH<sub>2</sub>CH(OH)CH<sub>2</sub>F)]F

|    |           |           |           |
|----|-----------|-----------|-----------|
| Pt | 0.036434  | -0.064790 | -2.047764 |
| Pt | -0.693305 | 0.217087  | 1.256043  |
| S  | 1.225241  | 0.887014  | -0.123938 |
| S  | -0.959616 | -1.499584 | -0.433736 |

|   |           |           |           |
|---|-----------|-----------|-----------|
| P | 1.043269  | 1.368407  | -3.579705 |
| P | -1.353694 | -1.043083 | -3.567328 |
| P | -2.080842 | -0.937222 | 2.673401  |
| P | -0.338884 | 1.897238  | 2.797653  |
| H | 0.559052  | 2.708196  | -3.631973 |
| C | 0.964238  | 0.886122  | -5.383615 |
| H | 2.425955  | 1.666351  | -3.426946 |
| H | -1.640487 | -2.415863 | -3.363190 |
| H | -2.674887 | -0.521851 | -3.598811 |
| C | -0.873797 | -0.972444 | -5.369236 |
| H | -1.987201 | -2.336995 | 2.538065  |
| C | -2.081712 | -0.621343 | 4.506336  |
| H | -3.466883 | -0.760816 | 2.364247  |
| H | -1.241109 | 3.002372  | 2.728057  |
| H | 0.886842  | 2.599200  | 2.713325  |
| C | -0.493879 | 1.443368  | 4.588804  |
| H | 1.302902  | 1.737059  | -5.985236 |
| H | 1.687570  | 0.074082  | -5.533499 |
| H | -0.054724 | -1.688379 | -5.516477 |
| H | -1.724743 | -1.326635 | -5.963004 |
| H | -3.034002 | -0.995543 | 4.902605  |
| H | -1.259526 | -1.234218 | 4.883766  |
| H | 0.298825  | 0.718727  | 4.798894  |
| H | -0.310351 | 2.344643  | 5.185317  |
| C | -1.884128 | 0.851305  | 4.931494  |
| C | -0.439686 | 0.432729  | -5.857466 |
| H | -0.429671 | 0.415155  | -6.954741 |
| H | -1.194245 | 1.181452  | -5.576157 |
| H | -2.006229 | 0.894180  | 6.021924  |
| H | -2.681549 | 1.486401  | 4.515814  |
| C | 2.332786  | -0.490497 | 0.475944  |
| C | 2.948751  | -0.186850 | 1.865698  |
| H | 3.611149  | 0.684835  | 1.764398  |
| C | 3.825959  | -1.380544 | 2.257366  |
| H | 3.207488  | -2.211705 | 2.608699  |
| H | 4.471923  | -1.708445 | 1.434477  |
| F | 4.680509  | -1.017109 | 3.315498  |
| H | 1.730400  | -1.401744 | 0.488451  |
| H | 3.128712  | -0.591966 | -0.270420 |
| O | 2.026774  | 0.119048  | 2.871206  |
| H | 1.385511  | -0.665535 | 3.060694  |
| F | 0.313058  | -1.620060 | 3.414146  |

#### 4: FCH<sub>2</sub>CH<sub>2</sub>CH<sub>2</sub>F

|   |           |           |           |
|---|-----------|-----------|-----------|
| C | 0.885089  | 0.134345  | -0.915158 |
| C | 0.773228  | -0.192823 | 0.564200  |
| H | 1.920577  | 0.070363  | -1.262469 |
| H | 0.249862  | -0.511691 | -1.527412 |
| C | -0.654554 | -0.191835 | 1.083325  |
| H | 1.220613  | -1.179874 | 0.739382  |
| H | 1.355986  | 0.537334  | 1.140719  |
| H | -0.689185 | -0.377427 | 2.160967  |
| H | -1.174300 | 0.742213  | 0.852786  |
| F | 0.458961  | 1.461211  | -1.140727 |

F -1.384296 -1.230467 0.465460

**2...4: [Pt<sub>2</sub>(μ-S)<sub>2</sub>(dppp)<sub>2</sub>]·FCH<sub>2</sub>CH<sub>2</sub>CH<sub>2</sub>F (van der Waals complex)**

|    |           |           |           |
|----|-----------|-----------|-----------|
| Pt | 0.201068  | -0.014674 | 2.033205  |
| Pt | -0.587696 | 0.051899  | -1.178251 |
| S  | 0.467713  | -1.590987 | 0.236649  |
| S  | 0.459388  | 1.637081  | 0.304181  |
| P  | -0.105184 | -1.742177 | 3.511709  |
| P  | -0.106256 | 1.653920  | 3.576570  |
| P  | -1.518628 | 1.750954  | -2.406070 |
| P  | -1.456537 | -1.622604 | -2.490816 |
| H  | -1.391586 | -2.354383 | 3.518175  |
| C  | 0.126757  | -1.387086 | 5.334017  |
| H  | 0.677822  | -2.917483 | 3.350013  |
| H  | 0.678783  | 2.832827  | 3.458614  |
| H  | -1.391987 | 2.266612  | 3.606164  |
| C  | 0.126628  | 1.228164  | 5.383485  |
| H  | -0.817621 | 2.985708  | -2.469225 |
| C  | -1.850833 | 1.403065  | -4.210894 |
| H  | -2.785645 | 2.255096  | -1.989008 |
| H  | -2.684682 | -2.215624 | -2.074238 |
| H  | -0.686470 | -2.807902 | -2.622654 |
| C  | -1.835584 | -1.210091 | -4.271703 |
| H  | -0.246578 | -2.243986 | 5.907072  |
| H  | 1.207500  | -1.321009 | 5.516255  |
| H  | 1.207618  | 1.154749  | 5.561269  |
| H  | -0.245689 | 2.062384  | 5.989715  |
| H  | -2.388741 | 2.256602  | -4.639950 |
| H  | -0.874323 | 1.344085  | -4.708359 |
| H  | -0.868749 | -1.132818 | -4.783205 |
| H  | -2.378994 | -2.052155 | -4.716471 |
| C  | -2.645212 | 0.096489  | -4.464848 |
| C  | -0.565467 | -0.088216 | 5.820898  |
| H  | -0.578368 | -0.109093 | 6.918647  |
| H  | -1.620105 | -0.082416 | 5.508756  |
| H  | -2.996487 | 0.118518  | -5.504872 |
| H  | -3.552387 | 0.077895  | -3.842463 |
| C  | 3.086850  | 0.919800  | -2.589257 |
| H  | 2.117049  | 1.253627  | -2.964376 |
| H  | 3.252884  | 1.349398  | -1.599467 |
| F  | 4.071300  | 1.463817  | -3.460652 |
| C  | 3.201490  | -0.591980 | -2.566734 |
| H  | 2.505151  | -0.975646 | -1.810123 |
| H  | 4.215700  | -0.871461 | -2.249612 |
| C  | 2.942543  | -1.253394 | -3.907344 |
| H  | 3.561163  | -0.833800 | -4.705316 |
| H  | 3.087454  | -2.336498 | -3.856021 |
| F  | 1.591222  | -1.054887 | -4.312355 |



**TS2**

|    |           |           |           |
|----|-----------|-----------|-----------|
| Pt | 1.826657  | -0.708686 | -0.427081 |
| Pt | -1.721431 | -0.569986 | -0.327195 |
| S  | 0.056587  | 0.599151  | -1.486807 |
| S  | 0.019408  | -2.093603 | 0.281275  |
| P  | 3.575304  | 0.686438  | -1.086337 |
| P  | 3.251937  | -1.671853 | 1.090011  |
| P  | -3.218749 | -1.791007 | 0.913844  |
| P  | -3.365737 | 0.932502  | -0.978413 |
| H  | 4.659552  | 0.081803  | -1.788308 |
| C  | 4.426257  | 1.533342  | 0.334799  |
| H  | 3.308661  | 1.748126  | -1.992600 |
| H  | 2.648263  | -2.531422 | 2.044783  |
| H  | 4.357415  | -2.488853 | 0.704514  |
| C  | 4.090247  | -0.371564 | 2.131568  |
| H  | -2.667917 | -2.560886 | 1.971443  |
| C  | -4.585565 | -0.841853 | 1.755233  |
| H  | -3.960207 | -2.814112 | 0.253972  |
| H  | -4.121304 | 0.561125  | -2.129512 |
| H  | -2.983557 | 2.232749  | -1.396252 |
| C  | -4.735390 | 1.287496  | 0.237447  |
| H  | 5.206999  | 2.191472  | -0.064637 |
| H  | 3.663726  | 2.176049  | 0.808999  |
| H  | 3.290461  | 0.229011  | 2.581104  |
| H  | 4.634065  | -0.871471 | 2.942006  |
| H  | -5.230815 | -1.555565 | 2.280698  |
| H  | -4.112452 | -0.203244 | 2.511721  |
| H  | -4.284831 | 1.862727  | 1.054284  |
| H  | -5.474808 | 1.931634  | -0.252622 |
| C  | -5.436212 | 0.021719  | 0.789835  |
| C  | 5.063142  | 0.549242  | 1.348750  |
| H  | 5.595819  | 1.156780  | 2.091511  |
| H  | 5.831129  | -0.063046 | 0.852397  |
| H  | -6.326874 | 0.351450  | 1.340384  |
| H  | -5.809495 | -0.597855 | -0.038895 |
| C  | 0.724372  | 2.420464  | -0.122497 |
| C  | -0.255394 | 3.558732  | -0.271089 |
| H  | -0.956145 | 3.390738  | -1.097009 |
| H  | 0.331369  | 4.449715  | -0.521116 |
| C  | -1.017709 | 3.875561  | 0.999445  |
| H  | -0.355564 | 3.856611  | 1.865577  |
| H  | -1.535810 | 4.836742  | 0.929193  |
| F  | -2.040898 | 2.902997  | 1.227832  |
| H  | 0.699215  | 1.770643  | 0.731880  |
| H  | 1.601829  | 2.444455  | -0.736976 |
| F  | 1.961336  | 3.488368  | 1.090828  |

**5: [Pt<sub>2</sub>(dppp)<sub>2</sub>(μ-S)(μ-SCH<sub>2</sub>CH<sub>2</sub>CH<sub>2</sub>F)]F**

|    |           |           |           |
|----|-----------|-----------|-----------|
| Pt | -0.410458 | -0.313228 | 1.715348  |
| Pt | -0.313510 | -0.337710 | -1.900362 |
| S  | 0.972483  | -1.279243 | -0.055629 |
| S  | -1.837609 | 0.285147  | -0.181591 |
| P  | 0.954273  | -0.963441 | 3.535407  |
| P  | -1.883296 | 0.571070  | 3.191501  |

P -1.757341 0.632977 -3.391380  
 P 1.166921 -0.992364 -3.579470  
 H 0.009855 -1.931144 4.119598  
 C 0.966142 0.052340 5.108823  
 H 1.966674 -1.951638 3.462264  
 H -2.730786 1.581500 2.662731  
 H -2.873602 -0.331841 3.669415  
 C -1.274215 1.332248 4.776221  
 H -2.554094 1.684288 -2.873459  
 C -1.023853 1.365505 -4.939689  
 H -2.777419 -0.202413 -3.927648  
 H 0.971152 -2.280929 -4.157069  
 H 2.547549 -1.128620 -3.265449  
 C 1.243960 0.071273 -5.115250  
 H 1.527376 -0.525418 5.854375  
 H 1.526742 0.968591 4.911073  
 H -0.669413 2.205824 4.501013  
 H -2.149609 1.693513 5.329531  
 H -1.843253 1.728739 -5.570816  
 H -0.433130 2.238040 -4.632876  
 H 1.741832 1.007942 -4.833012  
 H 1.881844 -0.428762 -5.852825  
 C -0.138103 0.380574 -5.743638  
 C -0.439585 0.369033 5.658547  
 H -0.326684 0.841376 6.643956  
 H -0.997721 -0.562604 5.826597  
 H 0.040571 0.825029 -6.731052  
 H -0.686615 -0.554074 -5.930804  
 C 2.638640 -0.436605 -0.030231  
 C 2.730880 1.014640 -0.513117  
 H 2.330432 1.110572 -1.530883  
 H 3.798718 1.270941 -0.561577  
 C 2.045407 2.036243 0.378815  
 H 0.960281 1.913428 0.392621  
 H 2.434363 2.015999 1.398221  
 F 2.304978 3.329056 -0.157666  
 H 2.957289 -0.508729 1.012844  
 H 3.282773 -1.071286 -0.648106  
 F 2.436215 0.141603 2.950105

### III) Table of Energies

| E (Hartees)          | 1          | 2          | 1...2(vdw) | TS1        | 3          |
|----------------------|------------|------------|------------|------------|------------|
| <b>B3lyp</b>         | -525,43241 | -392,82563 | -918,27495 | -918,22533 | -918,27615 |
| <b>B3lyp Solvent</b> | -525,44876 | -392,83111 | -918,28184 | -918,24267 | -918,29183 |
| <b>MP2</b>           | -520,58323 | -390,81785 | -911,41724 | -911,34593 | -911,41041 |
| <b>MP2 Solvent</b>   | -520,60721 | -390,82490 | -911,43016 | -911,37180 | -911,43158 |

| E (Hartees)          | 4          | 2          | 2...4(vdw) | TS2       | 5         |
|----------------------|------------|------------|------------|-----------|-----------|
| <b>B3lyp</b>         | -317,62147 | -392,82563 | -843,0648  | -843,0036 | -843,0557 |
| <b>B3lyp Solvent</b> | -317,62589 | -392,83111 | -843,0690  | -843,0186 | -843,0651 |
| <b>MP2</b>           | -315,97205 | -390,81785 | -836,5670  | -836,4843 | -836,5478 |
| <b>MP2 Solvent</b>   | -315,97352 | -390,82490 | -836,5778  | -836,5068 | -836,5622 |

#### IV) Graphic representation of relative energies (kcal/mol)

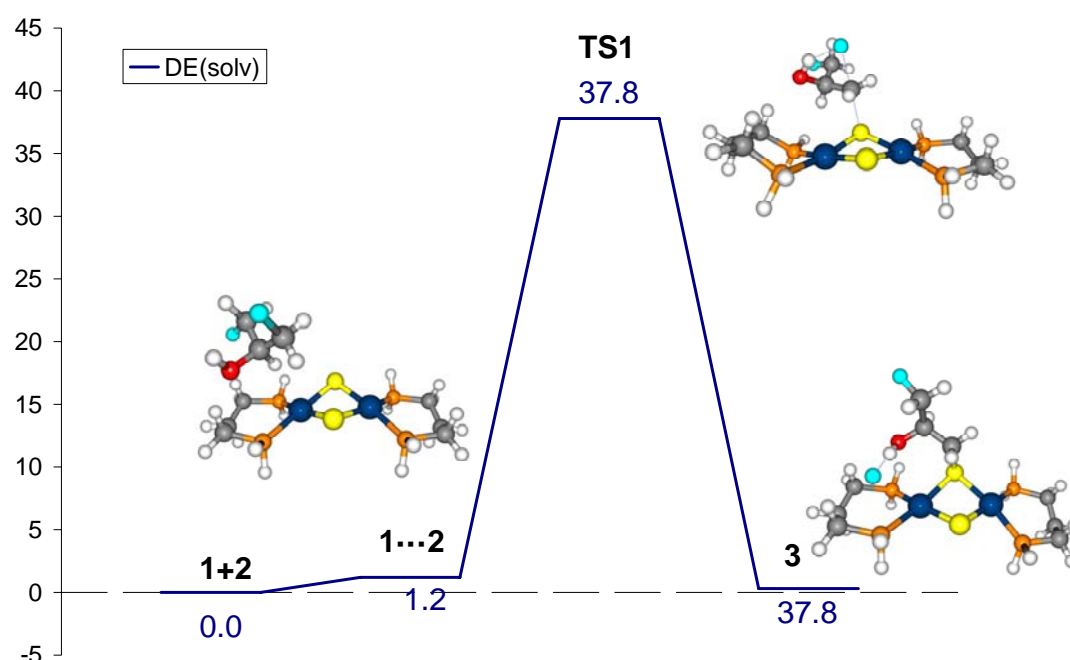

#### V) Experimental details

##### a) Materials and methods.

All the manipulations were carried out at room temperature under an atmosphere of pure nitrogen, and conventionally dried and degassed solvents were used throughout. These were Purex Analytical Grade from SDS. The synthesis of  $[\text{Pt}_2(\mu\text{-S})_2(\text{dppp})_2]$  (**2**) has already been reported.<sup>[9]</sup> The high purity level of 1,3-difluoro-2-propanol was confirmed by NMR analysis.

Elemental analyses were performed on a Carlo-Erba CHNS EA-1108 analyzer. The FAB-MS measurement was performed on a VG-QUATTRO (Micromass, UK) instrument in the positive ion mode using 3-nitrobenzil alcohol (NBA) as matrix. ESI MS measurements were performed using the same instrument under the following conditions: 10  $\mu\text{L}$  of sample was injected at 15  $\mu\text{L}/\text{min}$ ; capillary counter electrode voltage, 4.5 kV; lens-counter electrode voltage, 1.0 kV; cone potential, 55 V; source temperature, 90  $^\circ\text{C}$ . in a 1:1 mixture of methanol and water containing 1% formic acid

$^{31}\text{P}\{^1\text{H}\}$ ,  $^1\text{H}$ ,  $^{19}\text{F}$ ,  $^{13}\text{C}$  DEPT-135 NMR spectra were recorded from samples in  $\text{CDCl}_3$  solution at room temperature using a Bruker AVANCE360 spectrometer.  $^1\text{H}$  and  $^{13}\text{C}$  chemical shifts are relative to TMS, and  $^{19}\text{F}$  chemical shift to  $\text{CFCl}_3$ .  $^{31}\text{P}\{^1\text{H}\}$  NMR spectra were referenced to external 85%  $\text{H}_3\text{PO}_4$  (0.00 ppm). Multiplicities are abbreviated as follows: singlet (s), doublet (d)

[9] Mas-Ballesté, R.; Capdevila, M.; Champkin, P. A.; Clegg, W.; Coxall, R. A.; Lledós, A.; Mégret, C.; González-Duarte, P., *Inorg. Chem.* **2002**, *41*, 3218

and broad (br). Protons of the  $\text{FCH}_2\text{CH}(\text{OH})\text{CH}_2\text{S}^-$  ligand were assigned according to  $^1\text{H}$ - $^1\text{H}$  COSY and  $^1\text{H}\{^{19}\text{F}\}$  NMR spectral data.

### **b) Experimental Procedures and Characterization Data for 3.**

1,3-difluoro-2-propanol (200  $\mu\text{l}$ , 2.6 mmol) was added to a solution of  $[\text{Pt}_2(\mu\text{-S})_2(\text{dppp})_2]$  (300 mg, 0.2 mmol) in dry toluene (30 ml). After refluxing for 24 h the solvent was removed under vacuum. The remaining yellow solid was dissolved in  $\text{CH}_2\text{Cl}_2$  (20 ml) and the excess of 1,3-difluoro-2-propanol was removed with 5 successive extractions with water (20 ml each extraction). The resulting  $\text{CH}_2\text{Cl}_2$  solution was dried over  $\text{Na}_2\text{SO}_4$  anhydride and concentrated to about 5 mL. Addition of diethyl ether to the organic solution caused precipitation of a yellow solid. Yield: 111 mg (34.4%). Anal. Calcd for  $\text{C}_{57}\text{F}_2\text{H}_{58}\text{OP}_4\text{Pt}_2\text{S}_2\cdot\text{CHCl}_3$  (1494.63): C, 46.61; H, 3.98; S, 4.29. Found: C, 46.59; H, 4.02; S, 4.12. MS (FAB+):  $m/z = 1354.6$  Da. NMR data are presented in Tables S1-S6.

c) NMR data for compound **3** (below) and corresponding labeling scheme

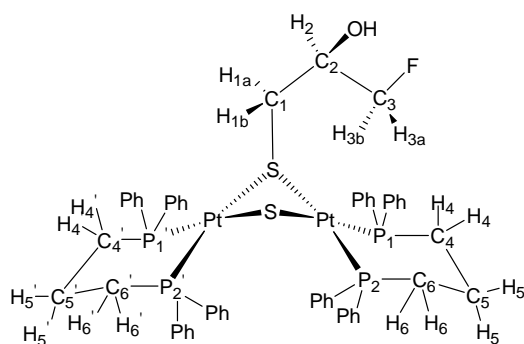

**Table S1:**  $^{31}\text{P}\{^1\text{H}\}$ NMR data observed for **3** at +50°C

| $^{31}\text{P}$ NMR (+50°C)          | $\delta(^{31}\text{P})$ (ppm) | $^1J_{\text{P-Pt}}$ (Hz) |
|--------------------------------------|-------------------------------|--------------------------|
| <b>P<sub>1</sub>, P<sub>1</sub>'</b> | 2.98                          | 2405                     |
| <b>P<sub>2</sub>, P<sub>2</sub>'</b> | 2.45                          | 3010                     |

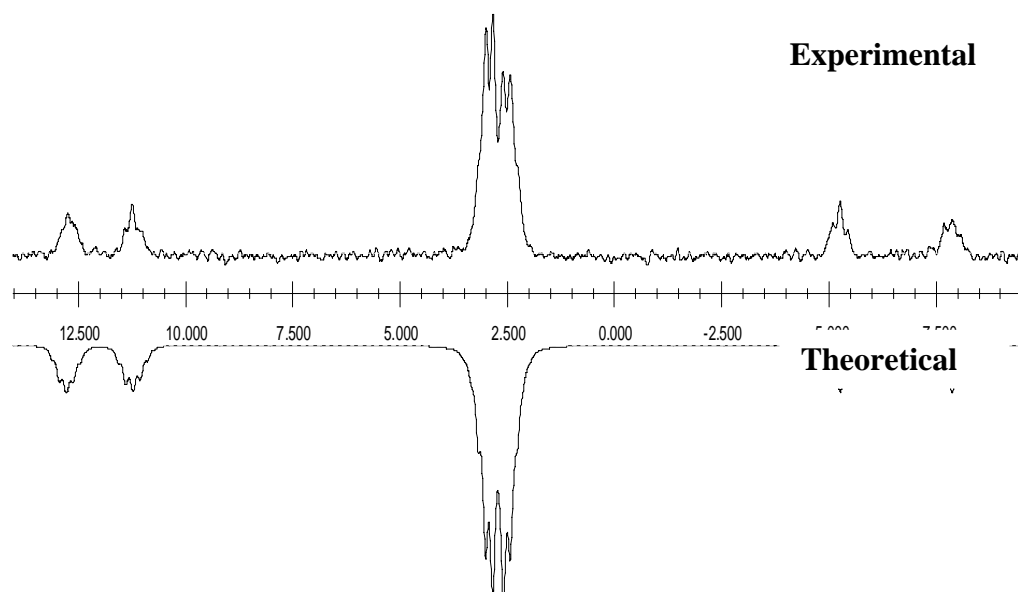

**Figure S1.** Comparison between experimental  $^{31}\text{P}\{^1\text{H}\}$ NMR spectrum obtained for product **3** at +50°C and the simulation carried out using the parameters shown in table S1

**Table S2:**  $^{31}\text{P}\{^1\text{H}\}$ NMR data observed for product **3** at  $-40^\circ\text{C}$

| $^{31}\text{P}$ NMR ( $-50^\circ\text{C}$ ) | $\delta(^{31}\text{P})$ (ppm) | $^1J_{\text{P-Pt}}$ (Hz) |
|---------------------------------------------|-------------------------------|--------------------------|
| <b>P<sub>1</sub></b>                        | 3.69                          | 2417                     |
| <b>P<sub>1</sub>'</b>                       | 3.00                          | 2370                     |
| <b>P<sub>2</sub></b>                        | 3.21                          | 2960                     |
| <b>P<sub>2</sub>'</b>                       | 2.54                          | 2985                     |

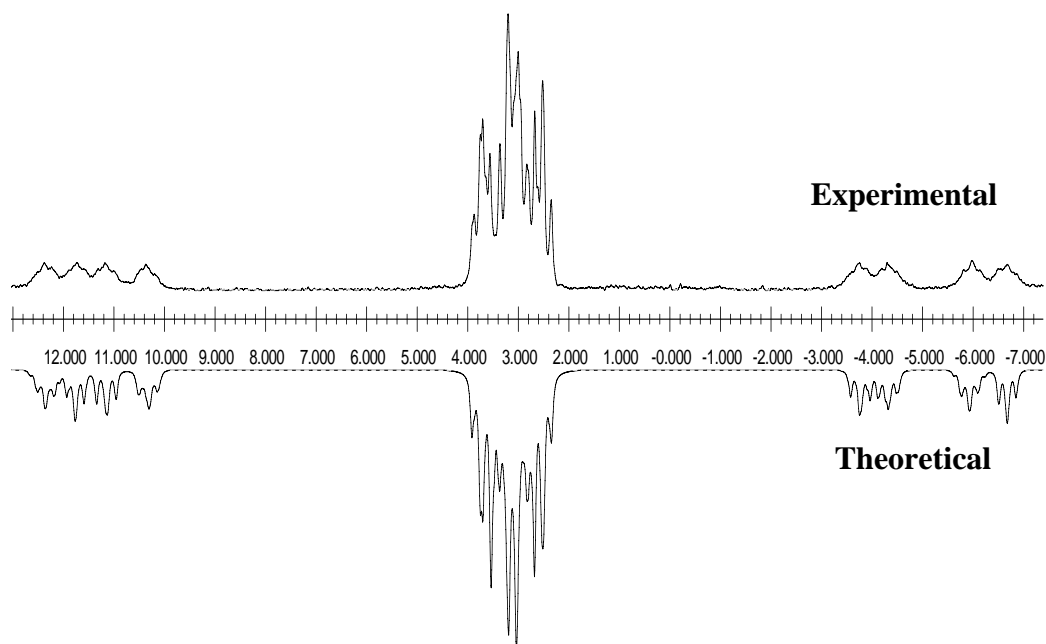

**Figure S2.** Comparison between experimental  $^{31}\text{P}\{^1\text{H}\}$ NMR spectrum obtained for product **3** at  $-40^\circ\text{C}$  and the simulation carried out using the parameters shown in table S2

**Table S3:**  $^{19}\text{F}$ -NMR data observed for product **3** at room temperature

| $^{19}\text{F}$ NMR  | $\delta(^{19}\text{F})$ (ppm) | $^2J_{\text{F-H}}$ (Hz) | $^3J_{\text{F-H}}$ (Hz) |
|----------------------|-------------------------------|-------------------------|-------------------------|
| <b>F</b>             | -229.1                        | 47.30                   | 19.30                   |
| <b>F<sup>-</sup></b> | -161.8                        |                         |                         |

**Table S4:**  $^{13}\text{C}$  DEPT-135 NMR data observed for product **3** at room temperature

| $^{13}\text{C}$ NMR                | $\delta(^{13}\text{C})$ (ppm)  | $^1J_{\text{C-F}}$ (Hz) |
|------------------------------------|--------------------------------|-------------------------|
| <b>C<sub>1</sub></b>               | 37.14                          |                         |
| <b>C<sub>5</sub></b>               | 18.63                          |                         |
| <b>C<sub>4</sub>,C<sub>6</sub></b> | 24.55                          |                         |
| <b>C<sub>3</sub></b>               | 84.95                          |                         |
| <b>C<sub>2</sub></b>               | 70.13                          | 171                     |
| <b>C<sub>arom</sub></b>            | 133.10, 130.54, 128.17, 127.92 |                         |

**Table S5:**  $^1\text{H}$ -NMR data observed for product **3** at room temperature

| $^1\text{H}$ NMR                                                                                | $\delta(^1\text{H})$ (ppm) | $^2J_{\text{H-H}}$ (Hz) | $^3J_{\text{H-H}}$ (Hz) | $^2J_{\text{F-H}}$ (Hz) | $^3J_{\text{F-H}}$ (Hz) |
|-------------------------------------------------------------------------------------------------|----------------------------|-------------------------|-------------------------|-------------------------|-------------------------|
| <b>H</b> <sub>1a</sub>                                                                          | 1.39                       | 12.86                   | 0                       |                         |                         |
| <b>H</b> <sub>1b</sub>                                                                          | 1.71                       | 12.86                   | 9.60                    |                         |                         |
| <b>H</b> <sub>5</sub> , <b>H</b> <sub>5'</sub>                                                  | 1.94                       |                         |                         |                         |                         |
| <b>H</b> <sub>4</sub> , <b>H</b> <sub>4'</sub> , <b>H</b> <sub>6</sub> , <b>H</b> <sub>6'</sub> | 2.73                       |                         |                         |                         |                         |
| <b>H</b> <sub>3a</sub>                                                                          | 3.88                       | 8.98                    | 5.13                    | 47.30                   |                         |
| <b>H</b> <sub>3b</sub>                                                                          | 3.99                       | 8.98                    | 4.70                    | 47.30                   |                         |
| <b>OH</b>                                                                                       | 4.13                       |                         |                         |                         |                         |
| <b>H</b> <sub>2</sub>                                                                           | 4.15                       |                         | 4.70, 5.13, 9.60        |                         | 19.30                   |
| <b>H</b> <sub>arom</sub>                                                                        | 7.00-7.86                  |                         |                         |                         |                         |

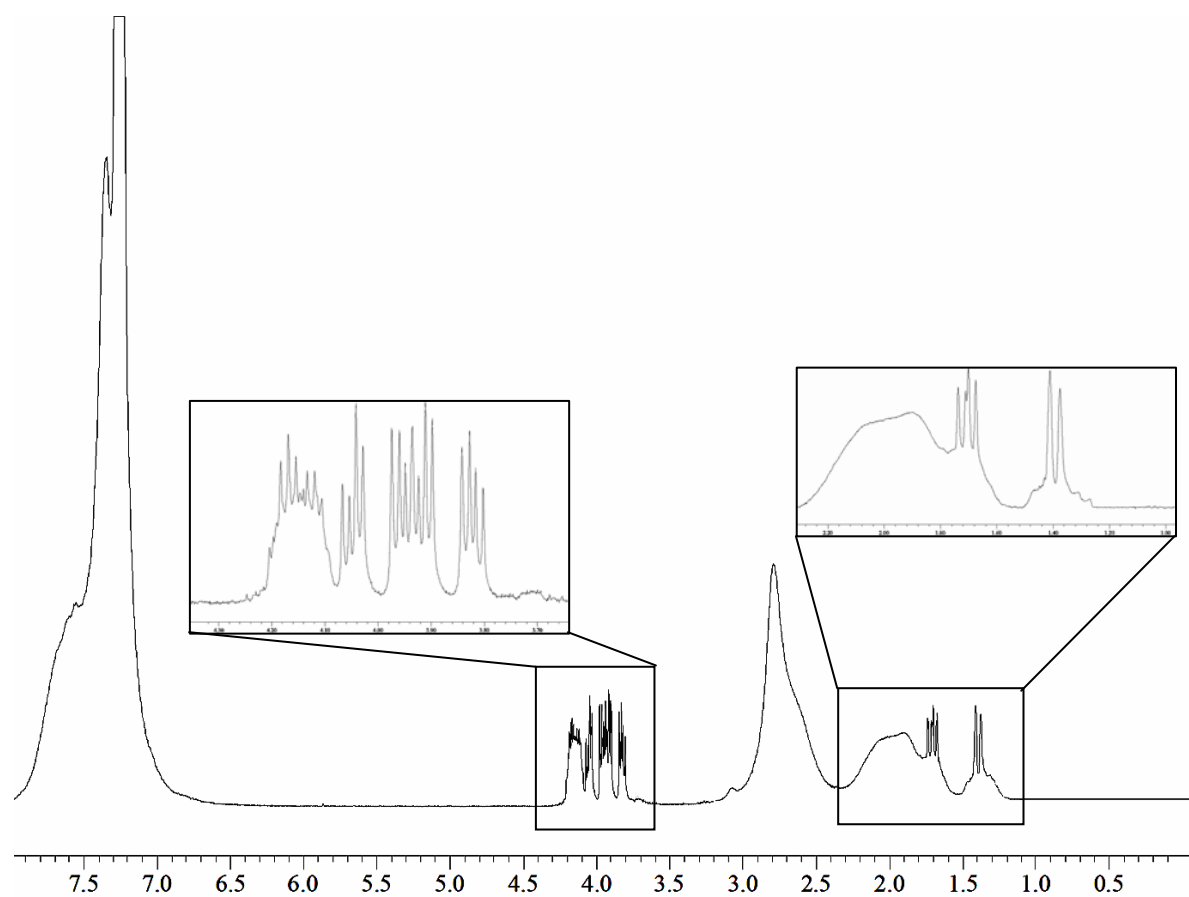

**Figure S3** -  $^1\text{H}$  NMR spectrum of **3** recorded in  $\text{CDCl}_3$  solution at room temperature.

#### d) FAB-MS data for compound 3

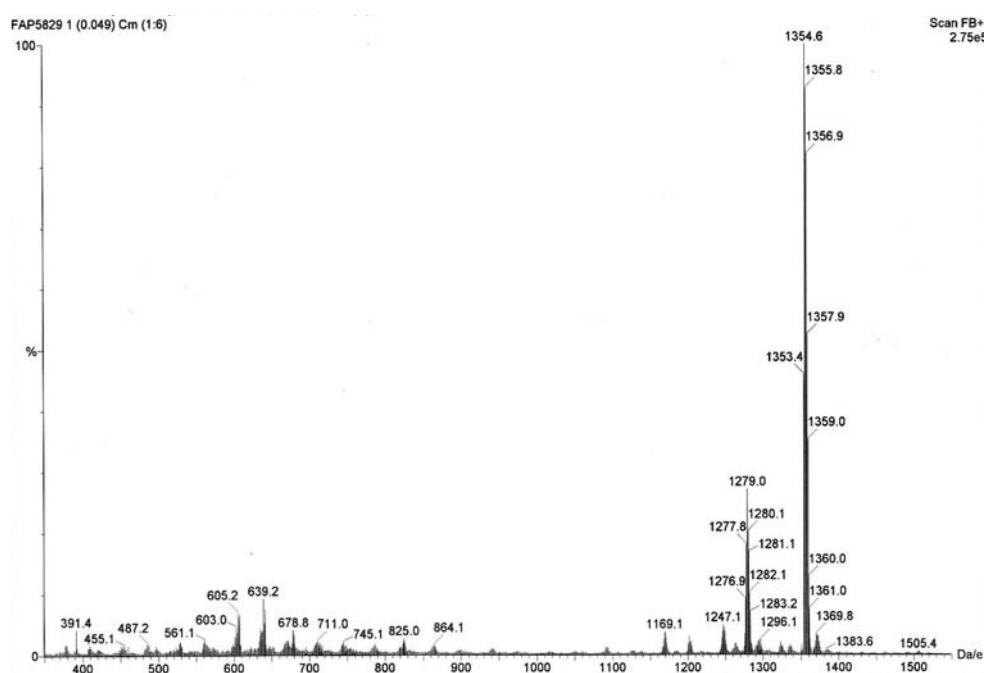

Figure S4 - FAB-MS<sup>+</sup> spectrum of 3 using 3-nitrobenzil alcohol (NBA) as matrix.

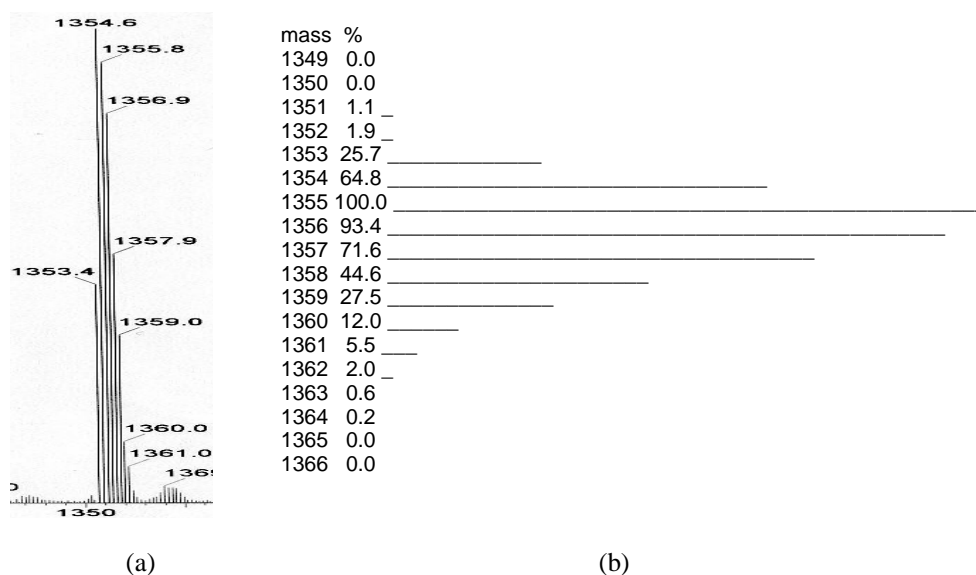

Figure S5 - (a) Region of the FAB-MS<sup>+</sup> spectrum corresponding to  $[\text{Pt}_2(\text{dppp})_2(\mu\text{-S})(\mu\text{-SCH}_2\text{CH}(\text{OH})\text{CH}_2\text{F})]^+$  cation. (b) Simulation of the isotopic distribution for the  $[\text{Pt}_2(\text{dppp})_2(\mu\text{-S})(\mu\text{-SCH}_2\text{CH}(\text{OH})\text{CH}_2\text{F})]^+$  cation.
